# Supplementary material
Source: PubMed Central journal article supplement (PMC5757527)
Supplement: NIHMS848692-supplement-Supplementary.pdf [file NIHMS848692-supplement-Supplementary.pdf]

Table S1 – Missense *RAG1* and *RAG2* mutations: protein expression, recombination activity, structural effects and in vivo clinical phenotype

| Gene               | Mutation | Domain | Protein Expression | Recombination Activity          | Function affected (based on structural modeling) | Clinical Phenotype   | References |
|--------------------|----------|--------|--------------------|---------------------------------|--------------------------------------------------|----------------------|------------|
| <b><i>RAG1</i></b> | R314W    | RING   | ↓↓                 | ↓↓                              | Unknown                                          | CID-G/AI             | 1, 2       |
|                    | C328Y    | RING   | ↓↓                 | ↓↓                              | Unknown                                          | OS                   | 3          |
|                    | C358Y    | RING   | nd                 | ↓                               | Unknown                                          | CVID                 | 4          |
|                    | K391E    | RING   | nd                 | ↓↓↓                             | Unknown                                          | OS                   | 2          |
|                    | R394Q    | NBD    | ↓↓↓                | ↓↓↓                             | Nonamer binding                                  | SCID                 | 2, 5       |
|                    | R394W    | NBD    | N                  | ↓↓↓                             | Nonamer binding                                  | OS                   | 2, 6       |
|                    | R396C    | NBD    | ↓                  | ↓↓↓                             | Nonamer binding                                  | OS                   | 2, 7       |
|                    | R396H    | NBD    | ↓↓↓                | ↓↓↓                             | Nonamer binding                                  | OS                   | 2, 7       |
|                    | R396L    | NBD    | ↓                  | ↓↓↓                             | Nonamer binding                                  | OS                   | 2, 3       |
|                    | S401P    | NBD    | ↓↓↓                | ↓↓↓                             | Nonamer binding                                  | OS                   | 2, 3       |
|                    | T403P    | NBD    | ↓↓↓                | ↓↓↓                             | Nonamer binding                                  | SCID                 | 2          |
|                    | R404Q    | NBD    | N                  | ↓↓↓                             | Nonamer binding                                  | SCID, OS             | 2, 8       |
|                    | R410Q    | NBD    | ↓↓↓                | ↓↓↓                             | Nonamer binding                                  | OS,<br>Leaky SCID    | 2, 3       |
|                    | R410W    | NBD    | ↓↓↓                | ↓↓↓                             | Nonamer binding                                  | OS                   | 2          |
|                    | L411P    | NBD    | nd                 | ↓↓↓                             | Structural integrity of NBD                      | OS                   | 2, 9       |
|                    | D429G    | NBD    | ↓↓                 | ↓↓↓                             | Structural integrity of NBD                      | SCID                 | 2, 7       |
|                    | V433M    | NBD    | ↓↓                 | ↓↓↓                             | Structural integrity of NBD                      | OS,<br>Leaky SCID    | 2, 3       |
|                    | M435V    | NBD    | ↓↓                 | ↓                               | Structural integrity of NBD                      | OS, CID-G/AI         | 2, 3       |
|                    | A444V    | NBD    | nd                 | ↓↓↓                             | Structural integrity of NBD                      | SCID, OS, Leaky SCID | 2, 3       |
|                    | L454Q    | NBD    | ↓↓↓                | ↓↓↓                             | Structural integrity of RAG1 dimer               | OS                   | 2, 10      |
|                    | R474C    | DDBD   | nd                 | N                               | Structure and DNA binding of DDBD                | OS, CID-G/AI, ICL    | 2, 11, 12  |
|                    | L506F    | DDBD   | nd                 | ↓↓↓                             | Structural integrity of DDBD                     | ICL                  | 2, 11      |
|                    | L514R *  | DDBD   | nd                 | nd                              | Structure may be tolerated                       | CID-G/AI             | -          |
| G516A              | DDBD     | N      | ↓                  | Structural integrity of RAG1    | CID-G/AI                                         | 2                    |            |
| W522C              | PreR     | nd     | ↓                  | Structural integrity of PreR    | CID-G/AI                                         | 2, 3, 12, 13         |            |
| D539V              | PreR     | nd     | ↓↓↓                | Exposed, near RAG1/2 interface  | OS                                               | 2                    |            |
| R559S              | PreR     | ↓↓↓    | ↓↓↓                | At the edge of RAG1/2 interface | OS                                               | 2                    |            |

|             |                    |      |     |       |                                                                          |                                                |           |
|-------------|--------------------|------|-----|-------|--------------------------------------------------------------------------|------------------------------------------------|-----------|
|             | R561H              | PreR | ↓↓↓ | ↓↓↓   | RAG1/2 interface with T169 of RAG2                                       | OS, $\gamma\delta$ T <sup>+</sup> SCID         | 2, 7      |
|             | H612R              | RNH  | N   | N     | Disordered structural integrity of RAG2 binding region                   | CID-G/AI                                       | 2, 14, 15 |
|             | R624H              | RNH  | nd  | ↓↓↓   | Active site, adjacent to D600                                            | SCID                                           | 2, 16     |
|             | R699Q/W            | RNH  | N   | ↓     | Structural stability of RNH                                              | CID-G/AI, CMO                                  | 2, 17     |
|             | E722K              | ZnC2 | nd  | ↓↓↓   | RAG1/2 interface                                                         | SCID                                           | 2, 16     |
|             | Y728H *            | ZnC2 | nd  | nd    | Structural stability, may affect zinc finger and RAG2 interface          | CID-G/AI                                       | -         |
|             | C730F              | ZnC2 | ↓↓↓ | ↓↓↓   | Structural integrity of ZnC2                                             | OS                                             | 2, 18     |
|             | L732P              | ZnC2 | N   | ↓↓↓   | Structural integrity of ZnC2                                             | SCID                                           | 2, 19     |
|             | R737H              | ZnC2 | ↓   | ↓↓↓   | Possibly DNA/coding end binding                                          | OS                                             | 2, 7      |
|             | R764P              | ZnC2 | ↓   | ↓↓↓   | At the edge of RAG1/2 interface                                          | SCID                                           | 2         |
|             | R764H              | ZnC2 | nd  | ↓↓    | At the edge of RAG1/2 interface                                          | IgAD                                           | 20        |
|             | E770K              | ZnC2 | nd  | ↓↓    | RAG1/2 interface                                                         | SCID                                           | 2, 19     |
|             | R778Q              | ZnC2 | N   | ↓↓↓   | Structural integrity of RAG1/2                                           | SCID                                           | 1, 2      |
|             | R778W              | ZnC2 | ↓   | ↓↓↓   | Structural integrity of RAG1/2                                           | SCID                                           | 2, 6, 21  |
|             | P786L              | ZnC2 | N   | ↓↓↓   | RAG1/2 interface                                                         | OS                                             | 2         |
|             | R841W              | ZnH2 | ↓↓↓ | ↓↓↓   | Structural integrity of DNA binding near heptamer                        | $\gamma\delta$ T <sup>+</sup> SCID, Leaky SCID | 2, 7, 22  |
|             | W896R              | ZnH2 | N   | ↓↓↓   | Structural integrity of ZnH2                                             | SCID                                           | 2, 23     |
|             | Y912C              | ZnH2 | N   | ↓↓↓   | Structural integrity of ZnH2                                             | OS                                             | 2, 7      |
|             | I956T              | ZnH2 | nd  | ↓↓↓   | Structural integrity of ZnH2                                             | OS                                             | 2, 6      |
|             | F974L              | CTD  | nd  | ↓     | Structural integrity of CTD                                              | CID-G/AI                                       | 2, 24     |
|             | R975Q              | CTD  | N   | ↓     | Structural integrity of CTD                                              | Leaky SCID, OS                                 | 2, 25     |
|             | R975W              | CTD  | nd  | ↓     | Structural integrity of CTD                                              | CID-G/AI                                       | 1, 2      |
|             | Q981P              | CTD  | ↓↓↓ | ↓↓↓   | Heptamer binding of inter-subunit                                        | $\gamma\delta$ T <sup>+</sup> SCID             | 2, 22     |
|             | K992E              | CTD  | nd  | ↓↓↓   | Probable DNA binding                                                     | OS                                             | 2, 18     |
| <b>RAG2</b> | V8I <sup>+</sup> * | Core | nd  | nd    | Conserved structural change, may be tolerated                            | CID-G/AI                                       | -         |
|             | G35A               | Core | nd  | ↓↓    | Structural integrity of RAG1/RAG2 interface (with E669 of RAG1)          | CID-G/AI, HIGHM                                | 26, 27    |
|             | G35V               | Core | nd  | ↓↓↓** | Structural integrity of RAG1/RAG2 interface (with E669 of RAG1)          | SCID                                           | 18        |
|             | R39G               | Core | nd  | ↓↓↓** | Structural integrity of RAG1/RAG2 interface (with E719 and R773 of RAG1) | SCID                                           | 18        |

|           |       |    |       |                                                            |              |        |
|-----------|-------|----|-------|------------------------------------------------------------|--------------|--------|
| C41W      | Core  | nd | ↓↓↓** | Structural integrity of RAG1/RAG2 interface                | OS, CID-G/AI | 7      |
| F62L      | Core  | nd | ↓↓    | Structural integrity destabilizing the RAG complex         | CID-G/AI     | 27     |
| T77N      | Core  | nd | ↓**   | Moderately destabilizing the RAG complex                   | CID-G/AI     | 1      |
| G95R      | Core  | nd | ↓↓↓** | Structural integrity of RAG1/RAG2 interface                | SCID         | 28     |
| R229E     | Core  | nd | ↓↓↓** | Structural integrity of RAG1/RAG2 interface (D546 of RAG1) | SCID         | 18     |
| M285R     | Core  | nd | ↓↓↓** | Partially exposed, maybe structural integrity              | OS           | 7      |
| M322T *   | Core  | nd | nd    | Structure may be tolerated                                 | CID-G/AI     | -      |
| D400H + * | Hinge | nd | nd    | Unknown structural modeling                                | CID-G/AI     | -      |
| G451A     | PHD   | nd | ↓/N** | Unknown structural modeling                                | CID-G/AI     | 1      |
| M459L     | PHD   | nd | ↓     | Unknown structural modeling                                | OS, HIGM     | 27, 29 |

This Table includes a list of missense mutations in *RAG1* and *RAG2* genes for which information on protein expression, recombination activity, and/or effects on structure or function are known. Correlation with the clinical phenotype of affected patients is shown. The mutations reported were either present in homozygous state or, when compound heterozygous, corresponded to the allele with the higher recombination activity. For patients who were compound heterozygous for missense mutations whose recombination activity has not been tested, both alleles are reported and marked with the symbol <sup>+</sup>. Novel mutations are marked with \*, and recombination activity determined by other methods than the *Rag*<sup>-/-</sup> Abelson virus-transformed pro-B cell platform is marked by \*\*.

Semiquantitative description of protein expression (as % of wild-type) is as follows: ↓↓↓, 0-<20; ↓↓, 20-<50; ↓, 50-<80; N, ≥80.

Recombination activity (as % of the activity of wild-type) is expressed as follows: ↓↓↓, 0-<10; ↓↓, 10-<30; ↓, 30-<60; ↓/N, 60-<75; N, >75.

CID-G/AI: combined immune deficiency with granulomas and/or autoimmunity; CMO: chronic multifocal osteomyelitis; CTD: carboxy-terminal domain; CVID: common variable immune deficiency; DDBD: DNA binding and dimerization domain;  $\gamma\delta$  T<sup>+</sup> SCID: severe combined immunodeficiency with expansion of  $\gamma\delta$ <sup>+</sup> T cells; HIGM: hyper-IgM; ICL: idiopathic CD4<sup>+</sup> T cell lymphopenia; IgAD: IgA deficiency; NBD: nonamer-binding domain; OS: Omenn syndrome; PHD: plant homology domain; PreR: pre-RNase H-like domain; RNH: RNase H-like domain; SCID: severe combined immune deficiency; ZnC2: zinc-binding domain with two cysteine residues; ZnH2: ZnC2: zinc-binding domain with two histidine residues.

nd: not done

## References to Supplementary Information Table S1

1. Schuetz, C. et al. An immunodeficiency disease with *RAG* mutations and granulomas. *N Engl J Med* **358**, 2030-2038 (2008).
2. Lee, Y.N. et al. A systematic analysis of recombination activity and genotype-phenotype correlation in human recombination-activating gene 1 deficiency. *J Allergy Clin Immunol* **133**, 1099-1108 (2014).
3. Villa, A. et al. V(D)J recombination defects in lymphocytes due to *RAG* mutations: severe immunodeficiency with a spectrum of clinical presentations. *Blood* **97**, 81-88 (2001).
4. Abolhassani, H. et al. A hypomorphic recombination-activating gene 1 (*RAG1*) mutation resulting in a phenotype resembling common variable immunodeficiency. *J Allergy Clin Immunol* **134**, 1375-1380 (2014).
5. Kutukculer, N., Gulez, N., Karaca, N.E., Aksu, G. & Berdeli, A. Novel mutations and diverse clinical phenotypes in recombinase-activating gene 1 deficiency. *Ital J Pediatr* **38**, 8 (2012).
6. Sobacchi, C., Marrella, V., Rucci, F., Vezzoni, P. & Villa A. *RAG*-dependent primary immunodeficiencies. *Hum Mutat* **27**, 1174-84 (2006).
7. Villa, A. et al. Partial V(D)J recombination activity leads to Omenn syndrome. *Cell* **93**, 885-896 (1998).
8. Noordzij, J.G. et al. The immunophenotypic and immunogenotypic B-cell differentiation arrest in bone marrow of *RAG*-deficient SCID patients corresponds to residual recombination activities of mutated *RAG* proteins. *Blood* **100**, 2145-2152 (2002).
9. Crestani, E. et al. *RAG1* reversion mosaicism in a patient with Omenn syndrome. *J Clin Immunol* **34**, 551-554 (2014).
10. Dalal, I. et al. Evolution of a T-B- SCID into an Omenn syndrome phenotype following parainfluenza 3 virus infection. *Clin Immunol* **115**, 70-73 (2005).
11. Kuijpers, T.W. et al. Idiopathic CD4<sup>+</sup> T lymphopenia without autoimmunity or granulomatous disease in the slipstream of *RAG* mutations. *Blood* **117**, 5892-5896 (2011).
12. Gruber, T.A. et al. Clinical and genetic heterogeneity in Omenn syndrome and severe combined immune deficiency. *Pediatr Transplant* **13**, 244-250 (2009).
13. De Ravin, S.S. et al. Hypomorphic *Rag* mutations can cause destructive midline granulomatous disease. *Blood* **116**, 1263-1271 (2010).
14. Buchbinder, D. et al. Identification of Patients with *RAG* Mutations Previously Diagnosed with Common Variable Immunodeficiency Disorders. *J Clin Immunol* **35**, 119-124 (2015).
15. Felgentreff, K. et al. Clinical and immunological manifestations of patients with atypical severe combined immunodeficiency. *Clin Immunol* **141**, 73-82 (2011).
16. Schwarz, K. et al. *RAG* mutations in human B cell-negative SCID. *Science* **274**, 97-99 (1996).
17. Reiff, A. et al. Exome sequencing reveals *RAG1* mutations in a child with autoimmunity and sterile chronic multifocal osteomyelitis evolving into disseminated granulomatous disease. *J Clin Immunol* **33**, 1289-1292 (2013).
18. Corneo, B. et al. Identical mutations in *RAG1* or *RAG2* genes leading to defective V(D)J recombinase activity can cause either T-B-severe combined immune deficiency or Omenn syndrome. *Blood* **97**, 2772-2776 (2001).
19. Asai, E. et al. Analysis of mutations and recombination activity in *RAG*-deficient patients. *Clin Immunol* **138**, 172-177 (2011).
20. Kato, T. et al. *RAG1* deficiency may present clinically as selective IgA deficiency. *J Clin Immunol* **35**, 280-288 (2015).
21. Yu, X. et al. Human syndromes of immunodeficiency and dysregulation are characterized by distinct defects in T-cell receptor repertoire development. *J Allergy Clin Immunol* **133**, 1109-1115 (2014).
22. de Villartay, J.P. et al. A novel immunodeficiency associated with hypomorphic *RAG1* mutations and CMV infection. *J Clin Invest* **115**, 3291-3299 (2005).
23. Zhang, J. et al. Novel *RAG1* mutation in a case of severe combined immunodeficiency. *Pediatrics* **116**, e445-9 (2005).
24. Henderson, L.A. et al. Expanding the spectrum of recombination-activating gene 1 deficiency: a family with early-onset autoimmunity. *J Allergy Clin Immunol* **132**, 969-71 e1-2 (2013).
25. Avila, E.M. et al. Highly variable clinical phenotypes of hypomorphic *RAG1* mutations. *Pediatrics* **126**, e1248-1252 (2010).
26. Riccetto, A.G. et al. Compound heterozygous *RAG2* mutations mimicking hyper IgM syndrome. *J Clin Immunol* **34**, 7-9 (2014).
27. Walter, J.E. et al. Broad-spectrum antibodies against self-antigens and cytokines in *RAG* deficiency. *J Clin Invest* **125**, 4135-48 (2015).
28. Gomez, C.A. et al. Mutations in conserved regions of the predicted *RAG2* kelch repeats block initiation of V(D)J recombination and result in primary immunodeficiencies. *Mol Cell Biol* **20**, 5653-5664 (2000).
29. Chou, J. et al. A novel homozygous mutation in recombination activating gene 2 in 2 relatives with different clinical phenotypes: Omenn syndrome and hyper-IgM syndrome. *J Allergy Clin Immunol* **130**, 1414-1416 (2012).
